# Supplementary material
Source: MDPI journal article supplement (https://www.mdpi.com/2075-163X/10/9/828)
Supplement: s1 [file s1]

Table 2: EPMA results of metasomatized marble

| <b>Serpentine</b>              | 1     | 2     | 3     | 4     | 5     | 6     | 7     | 8     | 9     | 10    |
|--------------------------------|-------|-------|-------|-------|-------|-------|-------|-------|-------|-------|
| SiO <sub>2</sub>               | 43.87 | 43.99 | 44.12 | 42.25 | 42.39 | 42.40 | 42.37 | 42.77 | 39.66 | 40.18 |
| TiO <sub>2</sub>               | 0.00  | 0.00  | 0.00  | 0.04  | 0.02  | 0.01  | 0.00  | 0.02  | 0.02  | 0.02  |
| Al <sub>2</sub> O <sub>3</sub> | 0.27  | 0.29  | 0.32  | 0.28  | 0.00  | 0.10  | 0.09  | 0.52  | 4.60  | 4.69  |
| FeO                            | 3.80  | 3.81  | 3.82  | 3.87  | 1.30  | 1.28  | 1.51  | 1.54  | 1.69  | 1.82  |
| MgO                            | 34.11 | 35.90 | 35.97 | 33.64 | 38.84 | 36.92 | 37.50 | 39.54 | 37.17 | 38.19 |
| MnO                            | 0.01  | 0.01  | 0.03  | 0.02  | 0.00  | 0.00  | 0.00  | 0.01  | 0.00  | 0.00  |
| CaO                            | 0.15  | 0.13  | 0.13  | 0.15  | 0.04  | 0.04  | 0.03  | 0.00  | 0.02  | 0.00  |
| Na <sub>2</sub> O              | 0.01  | 0.02  | 0.03  | 0.02  | 0.04  | 0.00  | 0.00  | 0.04  | 0.03  | 0.00  |
| F                              | 0.01  | 0.00  | 0.00  | 0.00  | 0.01  | 0.00  | 0.00  | 0.00  | 0.01  | 0.00  |
| Cl                             | 0.02  | 0.01  | 0.02  | 0.00  | 0.01  | 0.01  | 0.00  | 0.01  | 0.05  | 0.01  |
| H <sub>2</sub> O               | 12.20 | 12.45 | 12.50 | 11.86 | 12.33 | 12.10 | 12.20 | 12.60 | 12.40 | 12.65 |
| Sum                            | 94.45 | 96.62 | 96.94 | 92.13 | 94.97 | 92.87 | 93.71 | 97.06 | 95.60 | 97.56 |
| O=(F+Cl)                       | 0.01  | 0.00  | 0.01  | 0.00  | 0.00  | 0.00  | 0.00  | 0.00  | 0.00  | 0.00  |
| Sum                            | 94.44 | 96.62 | 96.93 | 92.13 | 94.96 | 92.87 | 93.71 | 97.05 | 95.60 | 97.56 |
| F                              | 0.00  | 0.00  | 0.00  | 0.00  | 0.00  | 0.00  | 0.00  | 0.00  | 0.00  | 0.00  |
| Cl                             | 0.00  | 0.00  | 0.00  | 0.00  | 0.00  | 0.00  | 0.00  | 0.00  | 0.00  | 0.00  |
| OH                             | 4.00  | 4.00  | 4.00  | 4.00  | 4.00  | 4.00  | 4.01  | 4.01  | 4.01  | 4.01  |
| Si+Ti+Al -2                    | 0.17  | 0.13  | 0.14  | 0.15  | 0.06  | 0.11  | 0.09  | 0.07  | 0.19  | 0.17  |
| Al+Fe+Mg+Mn                    | 2.83  | 2.87  | 2.86  | 2.85  | 2.93  | 2.89  | 2.91  | 2.94  | 2.94  | 2.95  |
| X <sub>Fe</sub>                | 0.06  | 0.06  | 0.06  | 0.06  | 0.02  | 0.02  | 0.02  | 0.02  | 0.02  | 0.03  |
| X <sub>Mg</sub>                | 0.94  | 0.94  | 0.94  | 0.94  | 0.98  | 0.98  | 0.98  | 0.98  | 0.98  | 0.97  |

| <b>Olivine</b>                 | 1     | 2     | 3     | 4     | 5     | 6      | 7      | 8      | 9     | 10    |
|--------------------------------|-------|-------|-------|-------|-------|--------|--------|--------|-------|-------|
| SiO <sub>2</sub>               | 41.66 | 42.15 | 41.80 | 41.66 | 42.10 | 41.99  | 42.41  | 42.67  | 41.50 | 41.40 |
| TiO <sub>2</sub>               | 0.00  | 0.00  | 0.01  | 0.00  | 0.00  | 0.00   | 0.02   | 0.01   | 0.02  | 0.00  |
| Al <sub>2</sub> O <sub>3</sub> | 0.00  | 0.00  | 0.00  | 0.00  | 0.00  | 0.00   | 0.05   | 0.00   | 0.00  | 0.01  |
| Cr <sub>2</sub> O <sub>3</sub> | 0.00  | 0.03  | 0.01  | 0.02  | 0.00  | 0.00   | 0.00   | 0.03   | 0.05  | 0.04  |
| FeO                            | 5.98  | 6.01  | 6.10  | 6.18  | 6.03  | 6.19   | 6.21   | 5.86   | 5.93  | 5.86  |
| MgO                            | 51.31 | 51.48 | 51.35 | 51.29 | 51.55 | 52.21  | 52.32  | 52.49  | 50.96 | 50.98 |
| MnO                            | 0.11  | 0.09  | 0.08  | 0.08  | 0.08  | 0.06   | 0.10   | 0.10   | 0.10  | 0.10  |
| CaO                            | 0.02  | 0.03  | 0.03  | 0.02  | 0.02  | 0.01   | 0.01   | 0.00   | 0.01  | 0.00  |
| Na <sub>2</sub> O              | 0.00  | 0.00  | 0.00  | 0.00  | 0.00  | 0.01   | 0.00   | 0.00   | 0.00  | 0.00  |
| Total                          | 99.06 | 99.76 | 99.36 | 99.24 | 99.77 | 100.45 | 101.11 | 101.16 | 98.54 | 98.39 |
| X <sub>Fe</sub>                | 0.06  | 0.06  | 0.06  | 0.06  | 0.06  | 0.06   | 0.06   | 0.06   | 0.06  | 0.06  |
| X <sub>Mg</sub>                | 0.94  | 0.94  | 0.94  | 0.94  | 0.94  | 0.94   | 0.94   | 0.94   | 0.94  | 0.94  |

| <b>Hematite</b>                | 1     | 2     | 3     | 4     | 5     |
|--------------------------------|-------|-------|-------|-------|-------|
| Cr <sub>2</sub> O <sub>3</sub> | 0.29  | 0.46  | 0.38  | 0.41  | 0.40  |
| TiO <sub>2</sub>               | 0.07  | 0.05  | 0.06  | 0.06  | 0.06  |
| FeO                            | 89.07 | 89.14 | 89.11 | 89.15 | 89.13 |
| MnO                            | 0.07  | 0.06  | 0.06  | 0.06  | 0.06  |
| MgO                            | 0.48  | 0.36  | 0.42  | 0.39  | 0.41  |
| Total                          | 89.97 | 90.07 | 90.02 | 90.05 | 90.08 |
| NiO                            | 0.00  | 0.00  | 0.00  | 0.00  | 0.00  |
| Cr <sub>2</sub> O <sub>3</sub> | 0.01  | 0.01  | 0.01  | 0.01  | 0.01  |
| TiO <sub>2</sub>               | 0.00  | 0.00  | 0.00  | 0.00  | 0.00  |
| FeO                            | 1.97  | 1.97  | 1.97  | 1.97  | 1.97  |
| MnO                            | 0.00  | 0.00  | 0.00  | 0.00  | 0.00  |
| MgO                            | 0.02  | 0.01  | 0.02  | 0.02  | 0.02  |
| Total Cations                  | 2.00  | 2.00  | 2.00  | 2.00  | 2.00  |

| <b>Phlogopite</b>              | 1     | 2     | 3     | 4     | 5     |
|--------------------------------|-------|-------|-------|-------|-------|
| SiO <sub>2</sub>               | 36.65 | 36.37 | 36.51 | 36.44 | 36.48 |
| TiO <sub>2</sub>               | 0.68  | 0.38  | 0.53  | 0.45  | 0.50  |
| Al <sub>2</sub> O <sub>3</sub> | 16.06 | 16.09 | 16.08 | 16.08 | 16.05 |
| Cr <sub>2</sub> O <sub>3</sub> | 0.00  | 0.00  | 0.00  | 0.00  | 0.00  |
| FeO                            | 2.46  | 2.74  | 2.55  | 2.65  | 2.64  |
| MgO                            | 25.51 | 25.14 | 25.33 | 25.25 | 25.28 |
| MnO                            | 0.01  | 0.00  | 0.00  | 0.01  | 0.01  |
| BaO                            | 0.03  | 0.01  | 0.02  | 0.01  | 0.02  |
| K <sub>2</sub> O               | 7.00  | 6.48  | 6.74  | 6.61  | 6.68  |
| Na <sub>2</sub> O              | 0.22  | 0.19  | 0.21  | 0.13  | 0.21  |
| F                              | 0.00  | 0.00  | 0.00  | 0.00  | 0.00  |
| Cl                             | 0.01  | 0.01  | 0.02  | 0.01  | 0.01  |
| H <sub>2</sub> O               | 4.01  | 4.01  | 4.01  | 4.01  | 4.01  |
| sum                            | 92.63 | 91.42 | 92.02 | 91.72 | 91.87 |
| O=(F+Cl)                       | 0.00  | 0.00  | 0.00  | 0.00  | 0.00  |
| Total                          | 92.63 | 91.41 | 92.02 | 91.72 | 91.87 |
| OH + F + Cl                    | 2.00  | 2.02  | 2.01  | 2.01  | 2.01  |
| Si + Ti + Al                   | 2.77  | 2.76  | 2.77  | 2.76  | 2.77  |
| Fe + Mg + Mn                   | 2.99  | 3.00  | 2.99  | 2.99  | 2.99  |
| K + Na                         | 0.70  | 0.65  | 0.67  | 0.66  | 0.67  |
| Total Cation                   | 22.00 | 21.98 | 21.99 | 21.99 | 21.99 |
| X <sub>Fe</sub>                | 0.05  | 0.06  | 0.05  | 0.06  | 0.06  |
| X <sub>Mg</sub>                | 0.95  | 0.94  | 0.95  | 0.94  | 0.94  |

| <b>Dolomite</b>                | 1     | 2     | 3     | 4     | 5     |
|--------------------------------|-------|-------|-------|-------|-------|
| MnO                            | 0.07  | 0.05  | 0.05  | 0.03  | 0.07  |
| Al <sub>2</sub> O <sub>3</sub> | 0.00  | 0.01  | 0.00  | 0.01  | 0.01  |
| CaO                            | 31.31 | 31.38 | 31.33 | 31.35 | 31.36 |
| P <sub>2</sub> O <sub>5</sub>  | 0.02  | 0.09  | 0.06  | 0.08  | 0.07  |
| MgO                            | 20.25 | 21.27 | 20.77 | 21.02 | 20.89 |
| FeO                            | 0.83  | 0.92  | 0.87  | 0.90  | 0.89  |
| Na <sub>2</sub> O              | 0.00  | 0.01  | 0.01  | 0.01  | 0.01  |
| NiO                            | 0.01  | 0.01  | 0.01  | 0.01  | 0.01  |
| Total                          | 52.50 | 53.74 | 53.10 | 53.39 | 53.28 |

| <b>Calcite</b>                 | 1     | 2     | 3     | 4     | 5     |
|--------------------------------|-------|-------|-------|-------|-------|
| Al <sub>2</sub> O <sub>3</sub> | 0.02  | 0.00  | 0.00  | 0.00  | 0.00  |
| CaO                            | 53.90 | 54.08 | 54.66 | 54.55 | 50.72 |
| MnO                            | 0.07  | 0.05  | 0.05  | 0.05  | 0.09  |
| K <sub>2</sub> O               | 0.00  | 0.00  | 0.00  | 0.00  | 0.00  |
| MgO                            | 2.54  | 3.19  | 2.02  | 2.39  | 3.36  |
| FeO                            | 0.25  | 0.29  | 0.26  | 0.26  | 0.38  |
| TiO <sub>2</sub>               | 0.02  | 0.02  | 0.02  | 0.01  | 0.03  |
| P <sub>2</sub> O <sub>5</sub>  | 0.11  | 0.01  | 0.07  | 0.04  | 0.08  |
| Na <sub>2</sub> O              | 0.00  | 0.03  | 0.00  | 0.00  | 0.00  |
| Total                          | 56.91 | 57.68 | 57.07 | 57.29 | 54.67 |

| <b>Spinel</b>                  | 1     | 2     | 3     | 4     | 5     |
|--------------------------------|-------|-------|-------|-------|-------|
| Al <sub>2</sub> O <sub>3</sub> | 65.26 | 65.35 | 65.31 | 65.34 | 65.32 |
| FeO                            | 6.54  | 6.36  | 6.46  | 6.40  | 6.45  |
| TiO <sub>2</sub>               | 0.08  | 0.03  | 0.05  | 0.04  | 0.04  |
| MnO                            | 0.05  | 0.05  | 0.05  | 0.03  | 0.05  |
| Cr <sub>2</sub> O <sub>3</sub> | 0.38  | 0.34  | 0.36  | 0.35  | 0.36  |
| MgO                            | 23.06 | 23.58 | 23.32 | 23.45 | 23.50 |
| NiO                            | 0.02  | 0.02  | 0.02  | 0.02  | 0.08  |
| Total                          | 95.39 | 95.73 | 95.56 | 95.64 | 95.60 |
| Al                             | 1.97  | 1.97  | 1.97  | 1.97  | 1.97  |
| Fe                             | 0.14  | 0.14  | 0.14  | 0.14  | 0.14  |
| Ti                             | 0.00  | 0.00  | 0.00  | 0.00  | 0.00  |
| Mn                             | 0.00  | 0.00  | 0.00  | 0.00  | 0.00  |
| Cr                             | 0.01  | 0.01  | 0.01  | 0.01  | 0.01  |
| Mg                             | 0.88  | 0.90  | 0.89  | 0.89  | 0.89  |
| Ni                             | 0.00  | 0.00  | 0.00  | 0.00  | 0.00  |
| Total                          | 3.01  | 3.01  | 3.01  | 3.01  | 3.01  |
| X <sub>Mg</sub>                | 0.86  | 0.87  | 0.87  | 0.87  | 0.87  |
