# Supplementary material
Source: MDPI journal article supplement (https://www.mdpi.com/2075-163X/10/9/828)
Supplement: s1 [file s1]

Table 5: Isocon method

| Oxide (wt%)                    | Marble (M) | Density g/cm <sup>3</sup> (marble-<br>2.75/metasomatized<br>marble-2.74) |            | Concentration to define isochon |        |
|--------------------------------|------------|--------------------------------------------------------------------------|------------|---------------------------------|--------|
|                                |            |                                                                          |            |                                 |        |
| SiO <sub>2</sub>               | 2.25       | 1.003649635                                                              |            | 2.258211679                     |        |
| Al <sub>2</sub> O <sub>3</sub> | 0.22       | 1.003649635                                                              |            | 0.22080292                      |        |
| Feo                            | 0.3        | 1.003649635                                                              |            | 0.301094891                     |        |
| MnO                            | 0.014      | 1.003649635                                                              |            | 0.014051095                     |        |
| MgO                            | 20.72      | 1.003649635                                                              |            | 20.79562044                     |        |
| CaO                            | 30.35      | 1.003649635                                                              |            | 30.46076642                     |        |
| Element (ppm)                  |            |                                                                          |            |                                 |        |
| Cr                             | 20         | 1.003649635                                                              |            | 20.0729927                      |        |
| Y                              | 1.3        | 1.003649635                                                              |            | 1.304744526                     |        |
| Ba                             | 8          | 1.003649635                                                              |            | 8.02919708                      |        |
| Tl                             | 0.05       | 1.003649635                                                              |            | 0.050182482                     |        |
| Oxide (wt%)                    | Marble (M) | Metasomatized marble (MM)                                                | Difference | Increase/Decrease (%)           |        |
| SiO <sub>2</sub>               | 2.25       | 14.67                                                                    |            | 12.42                           | 552.00 |
| Al <sub>2</sub> O <sub>3</sub> | 0.22       | 0.84                                                                     |            | 0.62                            | 281.82 |
| Feo                            | 0.3        | 2.13                                                                     |            | 1.83                            | 610.00 |
| MnO                            | 0.014      | 0.044                                                                    |            | 0.03                            | 214.29 |
| MgO                            | 20.72      | 18.1                                                                     |            | -2.62                           | -12.64 |
| CaO                            | 30.35      | 31.74                                                                    |            | 1.39                            | 4.58   |
| Na <sub>2</sub> O              | 0.03       | 0.02                                                                     |            | -0.01                           | -33.33 |
| K <sub>2</sub> O               | 0.01       | 0.03                                                                     |            | 0.02                            | 200.00 |
| TiO <sub>2</sub>               | 0.008      | 0.047                                                                    |            | 0.039                           | 487.50 |
| Element (ppm)                  | Marble (M) | Metasomatized marble (MM)                                                | Difference | Increase/Decrease (%)           |        |
| La                             | 0.73       | 7.13                                                                     |            | 6.4                             | 876.71 |
| Ce                             | 1.22       | 11.9                                                                     |            | 10.68                           | 875.41 |
| Pr                             | 0.14       | 1.24                                                                     |            | 1.1                             | 785.71 |
| Lu                             | 0.012      | 0.104                                                                    |            | 0.092                           | 766.67 |
| Sm                             | 0.11       | 0.93                                                                     |            | 0.82                            | 745.45 |
| Nd                             | 0.5        | 4.21                                                                     |            | 3.71                            | 742.00 |
| Eu                             | 0.039      | 0.307                                                                    |            | 0.268                           | 687.18 |
| Yb                             | 0.08       | 0.62                                                                     |            | 0.54                            | 675.00 |
| Tm                             | 0.012      | 0.089                                                                    |            | 0.077                           | 641.67 |
| Th                             | 0.25       | 1.69                                                                     |            | 1.44                            | 576.00 |
| Ho                             | 0.03       | 0.2                                                                      |            | 0.17                            | 566.67 |
| Er                             | 0.09       | 0.58                                                                     |            | 0.49                            | 544.44 |
| Dy                             | 0.16       | 0.89                                                                     |            | 0.73                            | 456.25 |
| Gd                             | 0.16       | 0.88                                                                     |            | 0.72                            | 450.00 |
| Cs                             | 0.1        | 0.5                                                                      |            | 0.4                             | 400.00 |
| Tb                             | 0.03       | 0.14                                                                     |            | 0.11                            | 366.67 |
| Y                              | 1.3        | 6                                                                        |            | 4.7                             | 361.54 |
| U                              | 0.23       | 0.93                                                                     |            | 0.7                             | 304.35 |
| V                              | 5          | 16                                                                       |            | 11                              | 220.00 |
| Sr                             | 53         | 142                                                                      |            | 89                              | 167.92 |
| Tl                             | 0.05       | 0.12                                                                     |            | 0.07                            | 140.00 |
| Zr                             | 4          | 9                                                                        |            | 5                               | 125.00 |
| Ba                             | 8          | 16                                                                       |            | 8                               | 100.00 |
| Nb                             | 0.2        | 0.4                                                                      |            | 0.2                             | 100.00 |
| Cr                             | 20         | 30                                                                       |            | 10                              | 50.00  |
