# Supplementary material
Source: MDPI journal article supplement (https://www.mdpi.com/2075-163X/10/9/828)
Supplement: s1 [file s1]

**Table 4: Bulk chemistry results**

| Oxide (wt%)                    | Detection Limit | Lamprophyrite (L) | Metasomatized marble (MM) | Marble (M) |
|--------------------------------|-----------------|-------------------|---------------------------|------------|
| SiO <sub>2</sub>               | 0.01            | 49.19             | 14.67                     | 2.25       |
| Al <sub>2</sub> O <sub>3</sub> | 0.01            | 13.38             | 0.84                      | 0.22       |
| FeO                            | 0.01            | 17.39             | 2.13                      | 0.3        |
| MnO                            | 0.001           | 0.173             | 0.044                     | 0.014      |
| MgO                            | 0.01            | 6.43              | 18.1                      | 20.72      |
| CaO                            | 0.01            | 7.39              | 31.74                     | 30.35      |
| Na <sub>2</sub> O              | 0.01            | 2.89              | 0.02                      | 0.03       |
| K <sub>2</sub> O               | 0.01            | 1.34              | 0.03                      | 0.01       |
| TiO <sub>2</sub>               | 0.001           | 2.297             | 0.047                     | 0.008      |
| P <sub>2</sub> O <sub>5</sub>  | 0.01            | 0.21              | 0                         | 0          |
| LOI                            |                 | 0.05              | 32.88                     | 44.87      |
| Total                          | 0.01            | 100.6             | 100.5                     | 98.78      |

| Analyte Symbol (ppm)     | Detection Limit | Lamprophyrite (L) | Metasomatized marble (MM) | Marble (M) |
|--------------------------|-----------------|-------------------|---------------------------|------------|
| Zr (Moderate enrichment) | 1               | 126               | 9                         | 4          |
| V (Moderate enrichment)  | 5               | 503               | 16                        | 5          |
| Cr (Moderate enrichment) | 20              | 70                | 30                        | 20         |
| Y (Moderate enrichment)  | 0.5             | 49                | 6                         | 1.3        |
| Ba (Moderate enrichment) | 2               | 209               | 16                        | 8          |
| Tl (Moderate enrichment) | 0.05            | 0.59              | 0.12                      | 0.05       |
| Th (High enrichment)     | 0.05            | 0.19              | 1.69                      | 0.25       |
| U (High enrichment)      | 0.01            | 0.23              | 0.93                      | 0.23       |
| Sr (High enrichment)     | 2               | 57                | 142                       | 53         |

| Analyte Symbol | Detection Limit | Lamprophyrite (L) | Metasomatized marble (MM) | Marble (M) |
|----------------|-----------------|-------------------|---------------------------|------------|
| La             | 0.05            | 3.79              | 7.13                      | 0.73       |
| Ce             | 0.05            | 12.1              | 11.9                      | 1.22       |
| Pr             | 0.01            | 2.09              | 1.24                      | 0.14       |
| Nd             | 0.05            | 11.5              | 4.21                      | 0.5        |
| Sm             | 0.01            | 4.46              | 0.93                      | 0.11       |
| Eu             | 0.005           | 1.67              | 0.307                     | 0.039      |
| Gd             | 0.01            | 6.99              | 0.88                      | 0.16       |
| Tb             | 0.01            | 1.32              | 0.14                      | 0.03       |
| Dy             | 0.01            | 8.79              | 0.89                      | 0.16       |
| Ho             | 0.01            | 1.91              | 0.2                       | 0.03       |
| Er             | 0.01            | 5.68              | 0.58                      | 0.09       |
| Tm             | 0.005           | 0.83              | 0.089                     | 0.012      |
| Yb             | 0.01            | 5.39              | 0.62                      | 0.08       |
| Lu             | 0.002           | 0.828             | 0.104                     | 0.012      |

| Analyte Symbol | Detection Limit | Lamprophyrite (L) | Metasomatized marble (MM) | Marble (M) |
|----------------|-----------------|-------------------|---------------------------|------------|
| Be             | 1               | <1                | <1                        | <1         |
| Rb             | 1               | 73                | 1                         | <1         |
| Ni             | 20              | 50                | 20                        | <20        |
| Cu             | 10              | 10                | <10                       | <10        |
| Zn             | 30              | 140               | 30                        | <30        |
| Ag             | 0.5             | 0.5               | <0.5                      | <0.5       |
| Nb             | 0.2             | 3                 | 0.4                       | 0.2        |
| Ta             | 0.01            | 0.15              | 0.03                      | <0.01      |
| W              | 0.5             | 1.2               | <0.5                      | <0.5       |
| Pb             | 5               | <5                | <5                        | <5         |
| Ge             | 0.5             | 1.7               | 0.5                       | <0.5       |
| Sc             | 1               | 50                | 3                         | <1         |
| Co             | 1               | 50                | 4                         | <1         |
| Ga             | 1               | 18                | 2                         | <1         |
| Cs             | 0.1             | 16.6              | 0.5                       | 0.1        |
| Hf             | 0.1             | 3.8               | 0.2                       | <0.1       |
