# Supplementary material
Source: MDPI journal article supplement (https://www.mdpi.com/2075-163X/10/9/828)
Supplement: s1 [file s1]

**Table 1: EPMA results of Lamprophyre sample**

| <b>Biote</b>                   | 1     | 2     | 3     | 4     | 5     | 6     | 7     | 8     | 9     | 10    |
|--------------------------------|-------|-------|-------|-------|-------|-------|-------|-------|-------|-------|
| SiO <sub>2</sub>               | 35.59 | 36.26 | 36.15 | 35.81 | 36.03 | 36.11 | 35.99 | 35.99 | 36.05 | 36.02 |
| TiO <sub>2</sub>               | 4.84  | 4.79  | 4.85  | 5.06  | 4.83  | 4.70  | 4.84  | 4.84  | 4.84  | 4.85  |
| Al <sub>2</sub> O <sub>3</sub> | 13.00 | 13.09 | 13.11 | 13.22 | 13.13 | 13.12 | 13.11 | 13.11 | 13.13 | 13.13 |
| Cr <sub>2</sub> O <sub>3</sub> | 0.00  | 0.00  | 0.00  | 0.00  | 0.00  | 0.00  | 0.00  | 0.00  | 0.00  | 0.00  |
| FeO                            | 21.91 | 21.71 | 21.72 | 21.37 | 21.57 | 21.58 | 21.64 | 21.64 | 21.60 | 21.59 |
| MgO                            | 8.06  | 8.62  | 8.45  | 8.63  | 8.76  | 8.77  | 8.55  | 8.55  | 8.62  | 8.62  |
| MnO                            | 0.05  | 0.07  | 0.08  | 0.09  | 0.09  | 0.09  | 0.08  | 0.08  | 0.08  | 0.08  |
| BaO                            | 0.00  | 0.00  | 0.00  | 0.00  | 0.00  | 0.00  | 0.00  | 0.00  | 0.00  | 0.00  |
| K <sub>2</sub> O               | 8.98  | 8.87  | 9.02  | 8.99  | 8.76  | 9.16  | 8.96  | 8.96  | 8.96  | 8.98  |
| Na <sub>2</sub> O              | 0.16  | 0.21  | 0.17  | 0.22  | 0.21  | 0.21  | 0.20  | 0.20  | 0.20  | 0.20  |
| F                              | 0.07  | 0.00  | 0.00  | 0.14  | 0.13  | 0.00  | 0.06  | 0.06  | 0.05  | 0.06  |
| Cl                             | 0.06  | 0.05  | 0.06  | 0.07  | 0.04  | 0.05  | 0.05  | 0.05  | 0.05  | 0.05  |
| H <sub>2</sub> O               | 3.65  | 3.79  | 3.78  | 3.64  | 3.65  | 3.78  | 3.72  | 3.72  | 3.72  | 3.72  |
| sum                            | 96.38 | 97.46 | 97.38 | 97.25 | 97.19 | 97.57 | 97.20 | 97.20 | 97.32 | 97.30 |
| O=(F+Cl)                       | 0.04  | 0.01  | 0.01  | 0.07  | 0.06  | 0.01  | 0.04  | 0.04  | 0.04  | 0.04  |
| Total                          | 96.33 | 97.45 | 97.37 | 97.18 | 97.13 | 97.56 | 97.17 | 97.17 | 97.29 | 97.27 |
| Total cations                  | 7.73  | 7.72  | 7.72  | 7.74  | 7.73  | 7.75  | 7.73  | 7.73  | 7.73  | 7.73  |
| OH + F + Cl                    | 2.00  | 2.00  | 2.00  | 2.01  | 2.00  | 2.00  | 2.00  | 2.00  | 2.00  | 2.00  |
| Si + Ti + Al                   | 3.14  | 3.14  | 3.14  | 3.13  | 3.13  | 3.12  | 3.13  | 3.13  | 3.13  | 3.13  |
| Fe + Mg + Mn                   | 2.43  | 2.45  | 2.43  | 2.44  | 2.46  | 2.46  | 2.44  | 2.44  | 2.45  | 2.45  |
| K + Na                         | 0.94  | 0.92  | 0.93  | 0.94  | 0.91  | 0.95  | 0.93  | 0.93  | 0.93  | 0.94  |
| Total Cation                   | 22.03 | 22.01 | 22.01 | 22.04 | 22.04 | 22.01 | 22.02 | 22.02 | 22.02 | 22.02 |
| X <sub>Fe</sub>                | 0.60  | 0.59  | 0.59  | 0.58  | 0.58  | 0.58  | 0.59  | 0.59  | 0.58  | 0.58  |
| X <sub>Mg</sub>                | 0.40  | 0.41  | 0.41  | 0.42  | 0.42  | 0.42  | 0.41  | 0.41  | 0.42  | 0.42  |

| Amphibole                      | 1.00  | 2.00  | 3.00  | 4.00  | 5.00  | 6.00  | 7.00  | 8.00  | 9.00  | 10.00 | 11.00  | 12.00  | 13.00  | 14.00 |
|--------------------------------|-------|-------|-------|-------|-------|-------|-------|-------|-------|-------|--------|--------|--------|-------|
| SiO <sub>2</sub>               | 43.57 | 43.25 | 42.71 | 43.25 | 42.00 | 43.70 | 43.20 | 43.98 | 43.83 | 43.42 | 47.05  | 48.45  | 49.56  | 44.31 |
| P <sub>2</sub> O <sub>5</sub>  | 0.01  | 0.00  | 0.00  | 0.02  | 0.01  | 0.00  | 0.04  | 0.07  | 0.05  | 0.02  | 0.05   | 0.01   | 0.03   | 0.05  |
| TiO <sub>2</sub>               | 2.37  | 2.36  | 2.41  | 2.19  | 2.20  | 2.29  | 2.36  | 2.25  | 2.29  | 2.27  | 2.45   | 2.33   | 2.50   | 2.34  |
| Al <sub>2</sub> O <sub>3</sub> | 9.32  | 9.49  | 9.67  | 9.34  | 8.85  | 9.60  | 9.42  | 9.02  | 9.18  | 9.55  | 10.68  | 10.84  | 11.22  | 9.94  |
| Cr <sub>2</sub> O <sub>3</sub> | 0.19  | 0.13  | 0.16  | 0.17  | 0.15  | 0.18  | 0.18  | 0.18  | 0.18  | 0.18  | 0.16   | 0.15   | 0.18   | 0.19  |
| MnO                            | 0.18  | 0.16  | 0.12  | 0.17  | 0.18  | 0.18  | 0.19  | 0.15  | 0.18  | 0.16  | 0.13   | 0.17   | 0.19   | 0.15  |
| FeO                            | 18.22 | 18.50 | 18.56 | 18.05 | 18.17 | 18.19 | 18.07 | 18.27 | 18.60 | 18.41 | 18.41  | 18.28  | 18.29  | 18.27 |
| NiO                            | 0.00  | 0.00  | 0.00  | 0.00  | 0.00  | 0.00  | 0.00  | 0.00  | 0.00  | 0.00  | 0.00   | 0.00   | 0.00   | 0.00  |
| MgO                            | 8.52  | 8.61  | 8.36  | 8.55  | 8.15  | 8.60  | 8.38  | 8.76  | 8.66  | 8.44  | 9.71   | 10.06  | 10.26  | 8.70  |
| CaO                            | 11.45 | 10.94 | 10.96 | 10.98 | 10.90 | 11.06 | 11.23 | 10.95 | 11.21 | 11.14 | 11.36  | 11.38  | 11.52  | 11.07 |
| Na <sub>2</sub> O              | 1.64  | 1.63  | 1.62  | 1.61  | 1.45  | 1.63  | 1.62  | 1.54  | 1.68  | 1.66  | 2.13   | 2.23   | 2.27   | 1.59  |
| K <sub>2</sub> O               | 1.02  | 1.07  | 1.15  | 1.02  | 1.01  | 0.99  | 1.09  | 0.99  | 0.97  | 1.05  | 1.04   | 1.02   | 0.91   | 1.05  |
| F                              | 0.14  | 0.29  | 0.02  | 0.09  | 0.00  | 0.22  | 0.06  | 0.00  | 0.00  | 0.11  | 0.03   | 0.00   | 0.48   | 0.00  |
| Cl                             | 0.06  | 0.02  | 0.03  | 0.04  | 0.04  | 0.01  | 0.03  | 0.05  | 0.02  | 0.03  | 0.03   | 0.05   | 0.03   | 0.05  |
| per 24 (O,OH,F,Cl)             |       |       |       |       |       |       |       |       |       |       |        |        |        |       |
| Fe <sup>3+</sup> /ΣFe used     | 0.00  | 0.02  | 0.02  | 0.01  | 0.01  | 0.01  | 0.00  | 0.03  | 0.01  | 0.00  | 0.04   | 0.05   | 0.06   | 0.02  |
| FeO                            | 18.22 | 18.06 | 18.26 | 17.90 | 18.01 | 18.03 | 18.07 | 17.80 | 18.45 | 18.35 | 17.62  | 17.33  | 17.19  | 17.91 |
| Fe2O3                          | 0.00  | 0.49  | 0.33  | 0.16  | 0.18  | 0.18  | 0.00  | 0.53  | 0.17  | 0.06  | 0.88   | 1.06   | 1.22   | 0.41  |
| H2O+                           | 1.90  | 1.84  | 1.97  | 1.94  | 1.97  | 1.88  | 1.95  | 1.98  | 1.98  | 1.93  | 1.97   | 1.98   | 1.77   | 1.98  |
| Total                          | 98.51 | 98.20 | 97.74 | 97.38 | 95.10 | 98.46 | 97.80 | 98.24 | 98.84 | 98.32 | 102.25 | 103.03 | 104.12 | 99.73 |
| Si                             | 6.68  | 6.65  | 6.61  | 6.70  | 6.69  | 6.69  | 6.67  | 6.74  | 6.70  | 6.67  | 6.49   | 6.49   | 6.43   | 6.68  |
| P                              |       |       |       | 0.00  | 0.00  |       | 0.00  | 0.00  | 0.00  | 0.00  | 0.00   |        | 0.00   | 0.00  |
| Al                             | 1.32  | 1.35  | 1.39  | 1.30  | 1.31  | 1.32  | 1.33  | 1.26  | 1.30  | 1.33  | 1.51   | 1.51   | 1.57   | 1.32  |
| T subtotal                     | 8.00  | 8.00  | 8.00  | 8.00  | 8.00  | 8.00  | 8.00  | 8.00  | 8.00  | 8.00  | 8.00   | 8.00   | 8.00   | 8.00  |
| Ti                             | 0.27  | 0.27  | 0.28  | 0.26  | 0.26  | 0.26  | 0.27  | 0.26  | 0.26  | 0.26  | 0.27   | 0.26   | 0.27   | 0.27  |
| Al                             | 0.37  | 0.37  | 0.38  | 0.40  | 0.35  | 0.42  | 0.39  | 0.37  | 0.35  | 0.40  | 0.35   | 0.35   | 0.35   | 0.45  |
| Cr                             | 0.02  | 0.02  | 0.02  | 0.02  | 0.02  | 0.02  | 0.02  | 0.02  | 0.02  | 0.02  | 0.02   | 0.02   | 0.02   | 0.02  |
| Fe <sup>3+</sup>               |       | 0.06  | 0.04  | 0.02  | 0.02  | 0.02  | 0.02  | 0.06  | 0.02  | 0.01  | 0.10   | 0.12   | 0.13   | 0.05  |

|   | P <sub>2</sub> O <sub>5</sub> | MgO | CaO    | FeO   | F     | Cl    | O=(F+Cl)   | Total      | REE   |
|---|-------------------------------|-----|--------|-------|-------|-------|------------|------------|-------|
| 1 | 39.594                        | 0   | 53.727 | 0.606 | 2.048 | 0.13  | 0.8915955  | 95.5354045 | 0.048 |
| 2 | 39.804                        | 0   | 52.992 | 0.295 | 3.331 | 0.134 | 1.43267484 | 95.4403252 | 0.04  |
| 3 | 41.744                        | 0   | 53.392 | 0.469 | 3.715 | 0.129 | 1.59322073 | 98.1797793 | 0.044 |

| Plagioclase                    | 1     | 2     | 3     | 4     | 5     | 6     | 7     | 8      | 9     | 10    |
|--------------------------------|-------|-------|-------|-------|-------|-------|-------|--------|-------|-------|
| SiO <sub>2</sub>               | 59.60 | 59.95 | 59.99 | 59.38 | 60.24 | 59.55 | 60.09 | 64.32  | 59.61 | 60.22 |
| Al <sub>2</sub> O <sub>3</sub> | 22.88 | 23.32 | 23.18 | 23.13 | 23.83 | 23.69 | 23.57 | 25.44  | 23.19 | 23.31 |
| FeO                            | 0.02  | 0.06  | 0.04  | 0.09  | 0.08  | 0.04  | 0.07  | 0.11   | 0.05  | 0.10  |
| CaO                            | 6.47  | 6.60  | 6.48  | 6.50  | 7.11  | 6.74  | 6.79  | 6.78   | 6.66  | 6.59  |
| Na <sub>2</sub> O              | 7.49  | 7.96  | 7.87  | 7.77  | 7.95  | 7.79  | 7.85  | 8.78   | 7.55  | 7.78  |
| K <sub>2</sub> O               | 0.14  | 0.13  | 0.15  | 0.12  | 0.10  | 0.14  | 0.10  | 0.10   | 0.10  | 0.12  |
| Total                          | 96.59 | 98.03 | 97.71 | 96.97 | 99.31 | 97.96 | 98.48 | 105.52 | 97.15 | 98.12 |
| Si                             | 2.74  | 2.72  | 2.73  | 2.73  | 2.71  | 2.71  | 2.72  | 2.71   | 2.73  | 2.73  |
| Al                             | 1.24  | 1.25  | 1.24  | 1.25  | 1.26  | 1.27  | 1.26  | 1.27   | 1.25  | 1.25  |
| Fe <sup>3+</sup>               | 0.00  | 0.00  | 0.00  | 0.00  | 0.00  | 0.00  | 0.00  | 0.00   | 0.00  | 0.00  |
| Ca                             | 0.32  | 0.32  | 0.32  | 0.32  | 0.34  | 0.33  | 0.33  | 0.31   | 0.33  | 0.32  |
| Na                             | 0.67  | 0.70  | 0.69  | 0.69  | 0.69  | 0.69  | 0.69  | 0.72   | 0.67  | 0.68  |
| K                              | 0.01  | 0.01  | 0.01  | 0.01  | 0.01  | 0.01  | 0.01  | 0.01   | 0.01  | 0.01  |
| Total                          | 4.98  | 5.01  | 5.00  | 5.00  | 5.01  | 5.00  | 5.00  | 5.01   | 4.98  | 4.99  |
| X <sub>Kfs</sub>               | 0.01  | 0.01  | 0.01  | 0.01  | 0.01  | 0.01  | 0.01  | 0.01   | 0.01  | 0.01  |
| X <sub>An</sub>                | 0.32  | 0.31  | 0.31  | 0.31  | 0.33  | 0.32  | 0.32  | 0.30   | 0.33  | 0.32  |

[illegible]
