# Supplementary material
Source: MDPI journal article supplement (https://www.mdpi.com/2075-163X/10/9/828)
Supplement: s1 [file s1]

**Table 3: EPMA results of Marble sample**

| <b>Serpentine</b>              | <b>1</b> | <b>2</b> | <b>3</b> | <b>4</b> | <b>5</b> |
|--------------------------------|----------|----------|----------|----------|----------|
| SiO <sub>2</sub>               | 41.74    | 41.33    | 41.53    | 41.43    | 41.48    |
| TiO <sub>2</sub>               | 0.10     | 0.04     | 0.07     | 0.05     | 0.06     |
| Al <sub>2</sub> O <sub>3</sub> | 2.50     | 2.46     | 2.48     | 2.47     | 2.48     |
| Cr <sub>2</sub> O <sub>3</sub> | 0.51     | 0.54     | 0.53     | 0.53     | 0.53     |
| FeO                            | 0.97     | 0.88     | 0.92     | 0.91     | 0.91     |
| MgO                            | 36.42    | 36.47    | 36.44    | 36.46    | 36.45    |
| MnO                            | 0.01     | 0.00     | 0.00     | 0.00     | 0.00     |
| CaO                            | 0.03     | 0.05     | 0.04     | 0.04     | 0.04     |
| Na <sub>2</sub> O              | 0.05     | 0.03     | 0.04     | 0.04     | 0.04     |
| F                              | 0.35     | 0.35     | 0.35     | 0.35     | 0.35     |
| Cl                             | 0.00     | 0.00     | 0.01     | 0.01     | 0.01     |
| H <sub>2</sub> O               | 12.40    | 12.30    | 12.29    | 12.28    | 12.28    |
| Sum                            | 95.07    | 94.45    | 94.71    | 94.57    | 94.63    |
| O=(F+Cl)                       | 0.15     | 0.15     | 0.15     | 0.15     | 0.15     |
| Sum                            | 94.93    | 94.31    | 94.56    | 94.42    | 94.48    |
| F                              | 0.11     | 0.11     | 0.11     | 0.11     | 0.11     |
| Cl                             | 0.00     | 0.00     | 0.00     | 0.00     | 0.00     |
| OH                             | 4.01     | 4.00     | 3.99     | 3.99     | 3.99     |
| Si+Ti+Al -2                    | 0.17     | 0.16     | 0.17     | 0.16     | 0.17     |
| Al+Fe+Mg+Mn                    | 2.84     | 2.85     | 2.85     | 2.85     | 2.85     |
| X <sub>Fe</sub>                | 0.01     | 0.01     | 0.01     | 0.01     | 0.01     |
| X <sub>Mg</sub>                | 0.99     | 0.99     | 0.99     | 0.99     | 0.99     |

  

| <b>Calcite</b>                | <b>1</b> | <b>2</b> | <b>3</b> | <b>4</b> | <b>5</b> |
|-------------------------------|----------|----------|----------|----------|----------|
| MnO                           | 0.02     | 0.01     | 0.01     | 0.01     | 0.01     |
| CaO                           | 51.49    | 51.46    | 51.47    | 51.47    | 51.47    |
| TiO <sub>2</sub>              | 0.01     | 0.00     | 0.00     | 0.00     | 0.00     |
| P <sub>2</sub> O <sub>5</sub> | 0.05     | 0.05     | 0.05     | 0.05     | 0.05     |
| MgO                           | 1.38     | 1.47     | 1.43     | 1.44     | 1.44     |
| FeO                           | 0.04     | 0.05     | 0.04     | 0.05     | 0.04     |

  

| <b>Dolomite</b>                | <b>1</b> | <b>2</b> | <b>3</b> | <b>4</b> | <b>5</b> |
|--------------------------------|----------|----------|----------|----------|----------|
| MnO                            | 0.02     | 0.01     | 0.01     | 0.01     | 0.01     |
| Al <sub>2</sub> O <sub>3</sub> | 0.00     | 0.00     | 0.00     | 0.00     | 0.00     |
| CaO                            | 30.11    | 30.32    | 30.22    | 30.27    | 30.24    |
| P <sub>2</sub> O <sub>5</sub>  | 0.02     | 0.05     | 0.03     | 0.04     | 0.04     |
| MgO                            | 19.75    | 19.65    | 19.70    | 19.67    | 19.69    |
| FeO                            | 0.12     | 0.15     | 0.13     | 0.14     | 0.14     |
